# Supplementary material
Source: MDPI journal article supplement (https://www.mdpi.com/2073-4395/11/3/465)
Supplement: s1 [file s1]

**A**

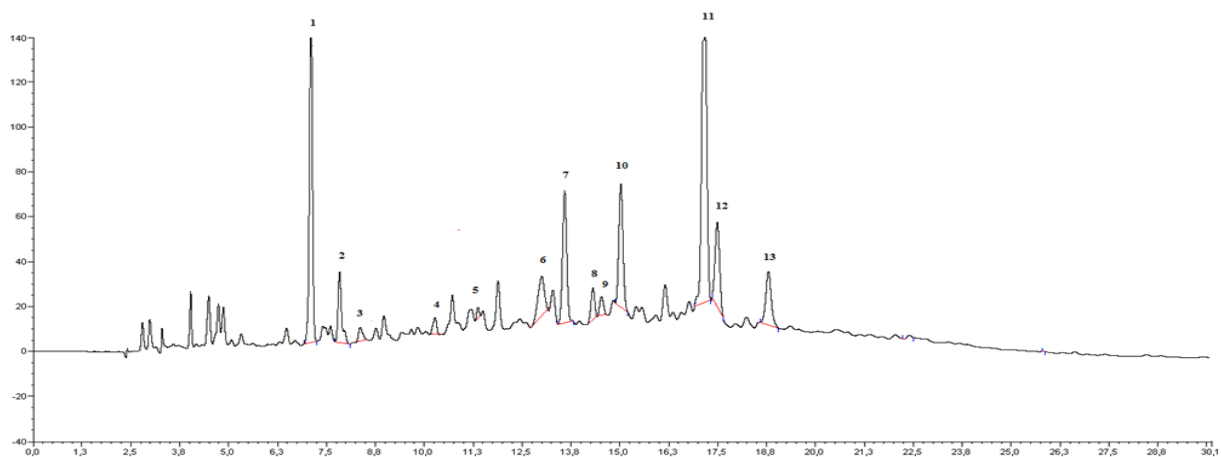

**B**

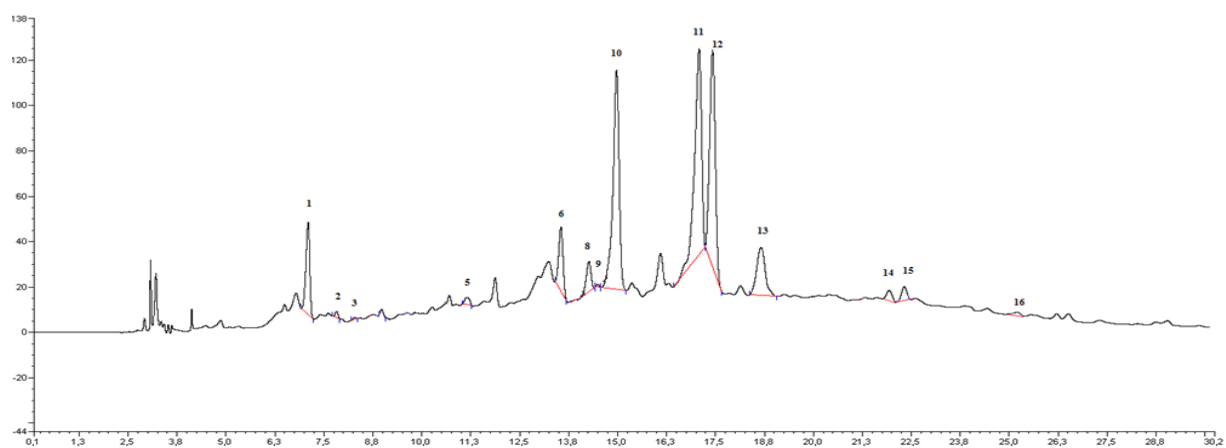

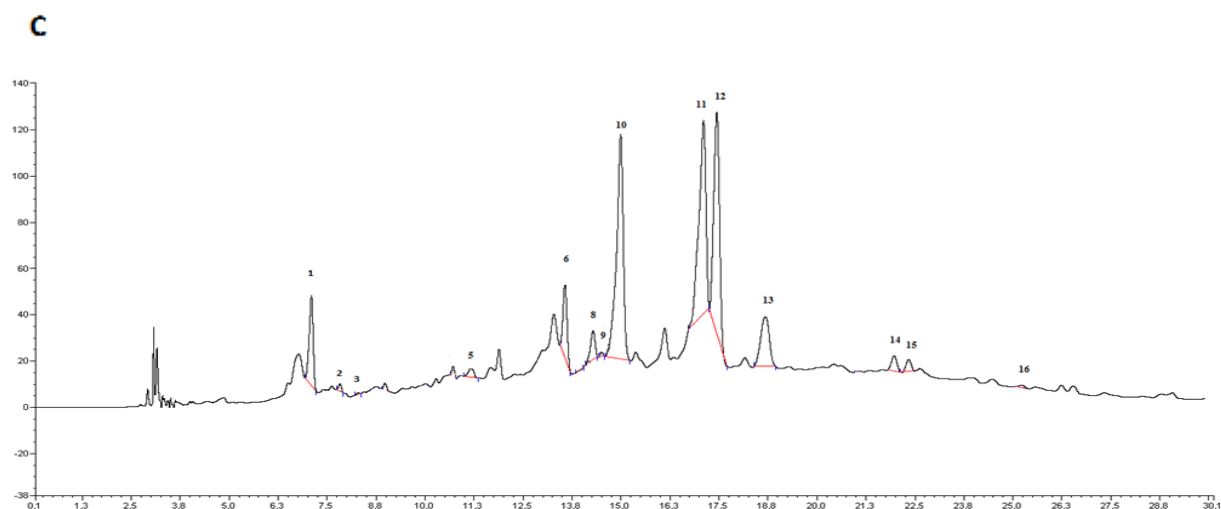

**Figure S1. A-C).** HPLC chromatograms, visualized at 280 nm, of the olive leaves extract object of the study: **A)**, water extract; **B)**, methanolic extract; and **C)**, ethanolic extract. Phenolic compounds tentatively identified (see text for details): 1, hydroxytyrosol-glucoside; 2, hydroxytyrosol; 3, DOPAC; 4, chlorogenic acid derivatives; 5, caffeic acid; 6, verbascoside; 7, p-coumaric acid; 8, rutin; 9, ferulic acid; 10, luteolin 7-O- glucoside; 11, oleuropein; 12, apigenin 7-O- glucoside; 13, ligstroside; 14, oleuropein aglycone; 15, luteolin; 16, apigenin. Compounds with absorption maxima wavelengths different from 280nm are visualized though their residual absorptions.
